# Supplementary material for: Mechanistic insights into the effect of the feed concentration on product formation during acid-catalyzed conversion of glucose in ethanol
Source: Royal Society of Chemistry journal article supplement (doi:10.1039/d2gc00300g), 2022-01-01
Supplement: d2gc00300g1.pdf [file d2gc00300g1.pdf]

**Mechanistic insights into the effect of feed concentration on product formation during acid-catalyzed conversion of glucose in ethanol**

Lincai Peng, Chaonan Tao, Hui Yang, Junhua Zhang and Huai Liu\*

BiomassChem Group, Faculty of Chemical Engineering, Kunming University of Science and Technology, Kunming, 650500, Yunnan, China

\*Corresponding author E-mail address: ankelliu@sina.com (H. Liu).

**SUPPLEMENTARY  
INFORMATION**

## Table of Contents:

**Figure S1.** The conversion of glucose to alkyl levulinate over  $\text{Al}_2(\text{SO}_4)_3$  in methanol (a) and ethanol (b).

**Figure S2.** The photo of photocatalytic reactor with a transparent quartz seal (a), 20 g/L glucose solution at 30 °C (b) and after the temperature of the reactor increased to 160 °C (c), 200 g/L glucose solution at 30 °C (d) and after the temperature of the reactor increased to 160 °C (e).

**Figure S3.** The conversion of glucose under catalyst-free conditions at two different concentrations. Reaction conditions: 20 g/L or 200 g/L glucose, no catalyst, 50 mL ethanol, 180 °C.

**Figure S4.** Effect of added EL on the formation of products in the reaction process. Reaction conditions: 20 g/L glucose, 0.001 mol  $\text{Al}_2(\text{SO}_4)_3$ , 50 mL ethanol-containing different volume additional EL, 180 °C for 3 h.

**Figure S5.** GPC spectra and average molecular weight of  $\text{WSO}_{20}$  (a) and  $\text{WSO}_{200}$  (b); molecular weight distribution of  $\text{WSO}_{20}$  (c) and  $\text{WSO}_{200}$  (d).

**Figure S6.** Assignment of the  $^1\text{H}$ - $^{13}\text{C}$  HSQC-NMR spectrum corresponding to  $\text{WSO}_{200}$ . Abbreviations: as an example, “1(G)” means signal from the H-1 and C-1 of the glucose residue (G).

**Figure S7.** FTIR spectra of WSO and SHU from 50 g/L and 150 g/L of glucose conversion.

**Figure S8.** FT-IR spectra of WSO from 20 g/L (a) and 200 g/L (b) of glucose conversion with the increasing of the reaction time.

**Figure S9.**  $^{13}\text{C}$  CP MAS NMR spectra of SHU from 50 g/L (a), 100 g/L (b) and 150 g/L (c) of glucose conversion.

**Figure S10.** Pyrolysis/GC–MS chromatogram of  $\text{SHU}_{20}$  (a) and  $\text{SHU}_{200}$  (b).

**Figure S11.** Raman spectra of SHU from 50 g/L (a), 100 g/L (b) and 150 g/L (c) of glucose conversion.

**Figure S12.**  $\text{N}_2$  adsorption–desorption of  $\text{SHU}_{20}$  and  $\text{SHU}_{200}$ .

**Figure S13.** Transformation pathway of glucose to form DAH and DH.

**Table S1.** Assignment of the signals in the  $^{13}\text{C}$  CP MAS NMR spectra of SHU.

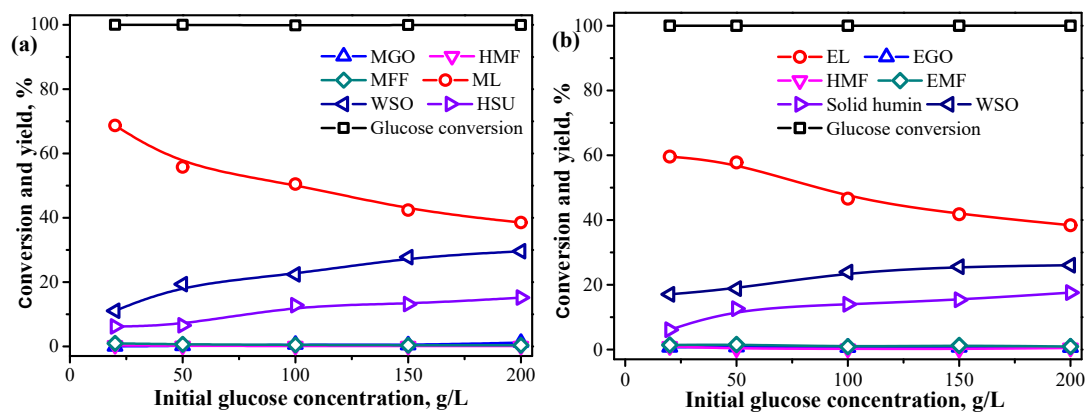

**Figure S1.** The conversion of glucose to alkyl levulinate over  $\text{Al}_2(\text{SO}_4)_3$  in methanol (a) and ethanol (b). Reaction conditions: 0.01 mol  $\text{Al}_2(\text{SO}_4)_3$ , 50 mL alcohol, 180 °C, 180 min. (MGO and EGO represents methyl- and ethyl-D-glucopyraoside, respectively; MFF and EMF represents 5-methoxy- and 5-ethoxy-methylfurfural respectively)

NOTE: As shown in Figure S1, the substrate concentration has similar influence on the conversion of glucose in methanol and ethanol, the processing of glucose in ethanol at two distinct concentrations (20 and 200 g/L) was selected as model reaction to investigate the evolution of humins during the conversion of dilute and concentrated glucose.

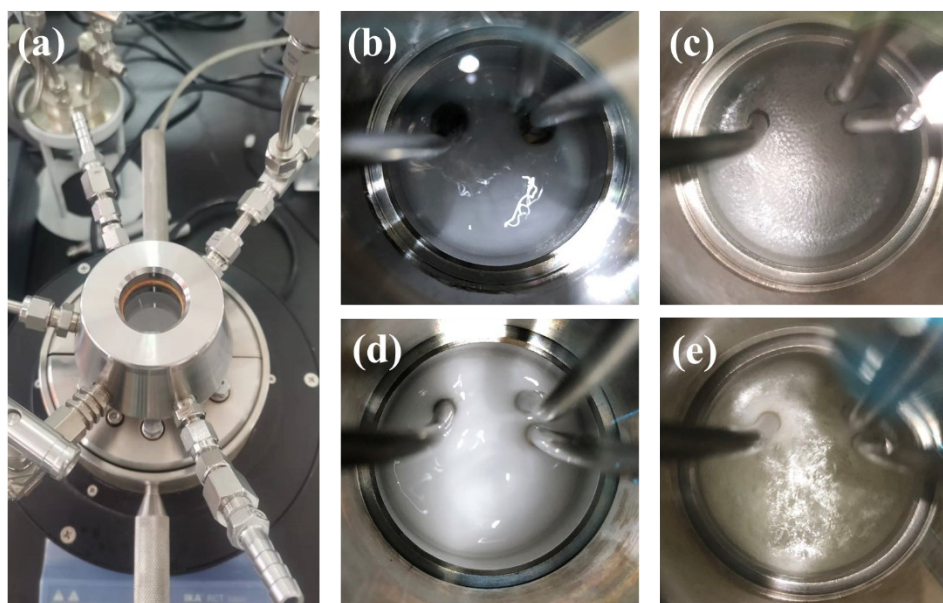

**Figure S2.** The photo of photocatalytic reactor with a transparent quartz seal (a), 20 g/L glucose solution at 30 °C (b) and after the temperature of the reactor increased to 160 °C (c), 200 g/L glucose solution at 30 °C (d) and after the temperature of the reactor increased to 160 °C (e).

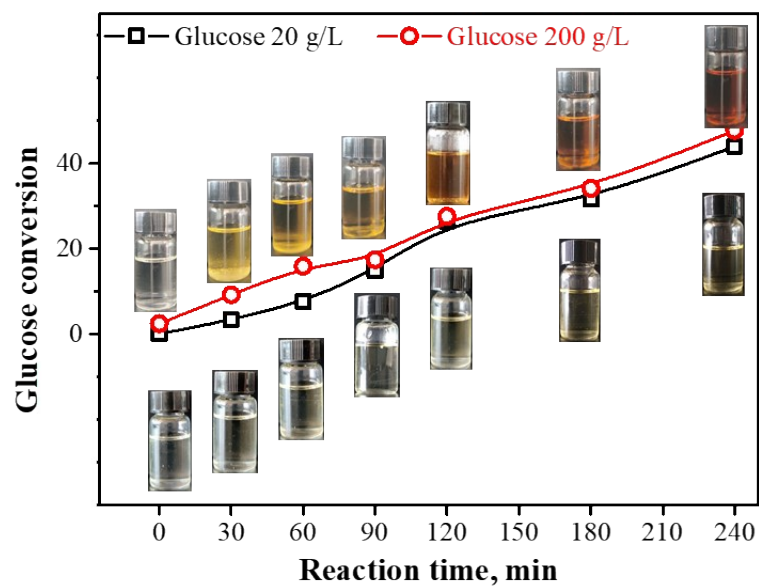

**Figure S3.** The conversion of glucose under catalyst-free conditions at two different concentrations. Reaction conditions: 20 g/L or 200 g/L glucose, no catalyst, 50 mL ethanol, 180 °C.

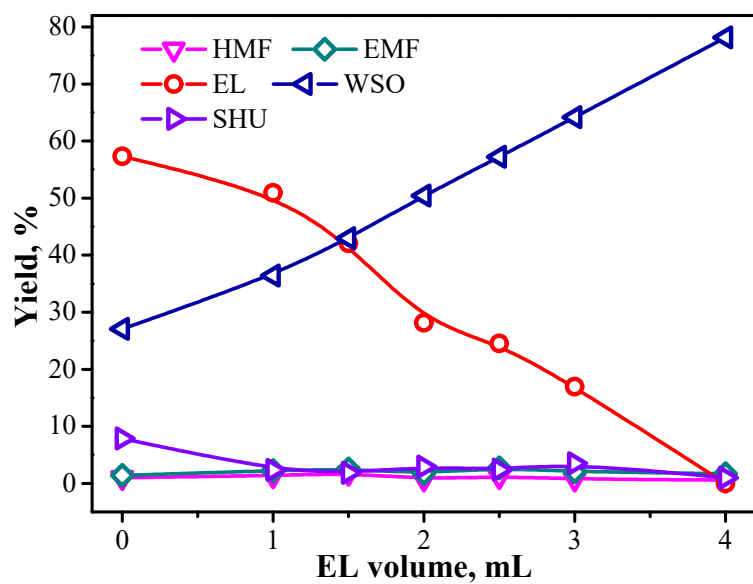

**Figure S4.** Effect of added EL on the formation of products in the reaction process.

Reaction conditions: 20 g/L glucose, 0.001 mol  $\text{Al}_2(\text{SO}_4)_3$ , 50 mL ethanol-containing different volume additional EL, 180 °C for 3 h.

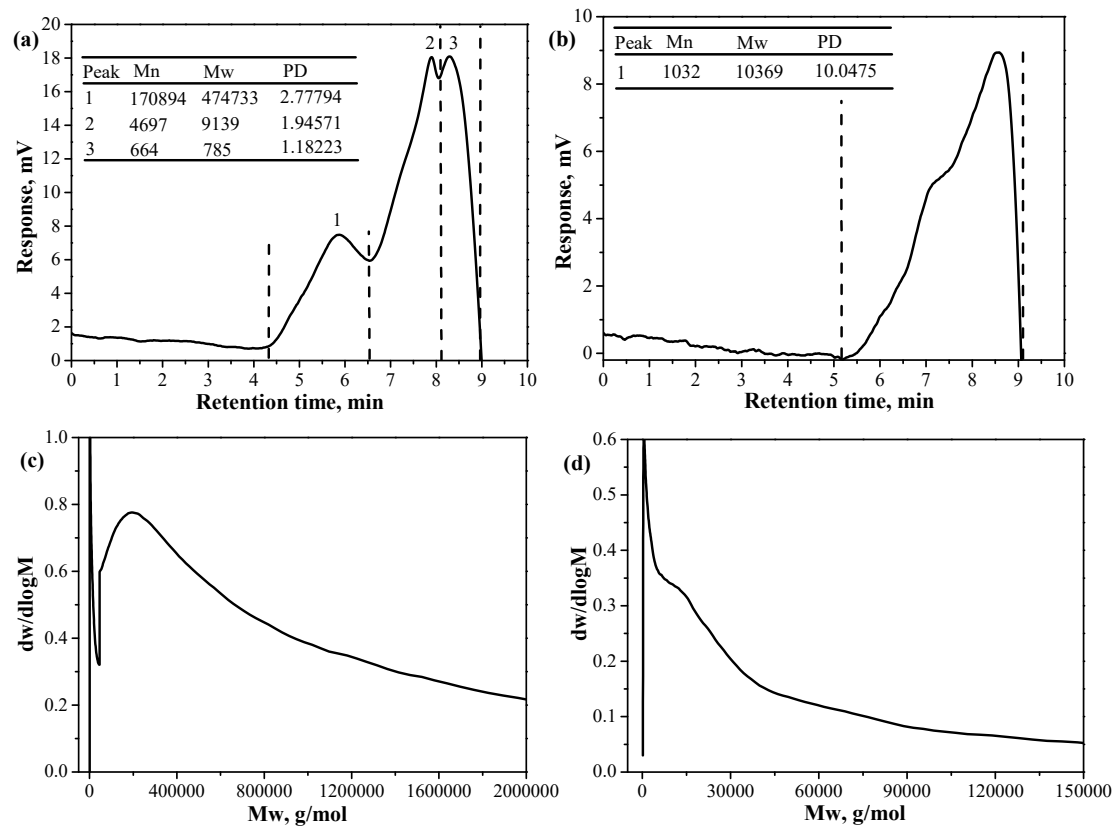

**Figure S5.** GPC spectra and average molecular weight of WSO<sub>20</sub> (a) and WSO<sub>200</sub> (b); molecular weight distribution of WSO<sub>20</sub> (c) and WSO<sub>200</sub> (d).

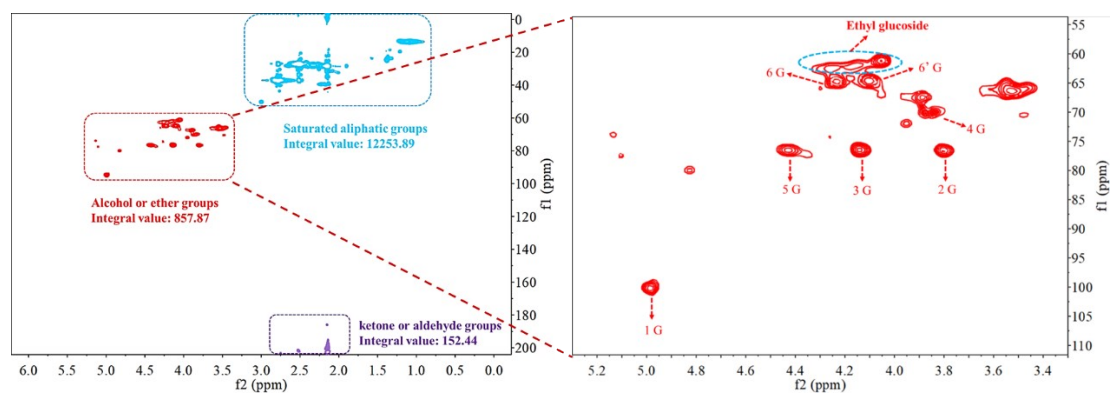

**Figure S6.** Assignment of the  $^1\text{H}$ - $^{13}\text{C}$  HSQC-NMR spectrum corresponding to  $\text{WSO}_{200}$ . Abbreviations: as an example, “1(G)” means signal from the H-1 and C-1 of the glucose residue (G).



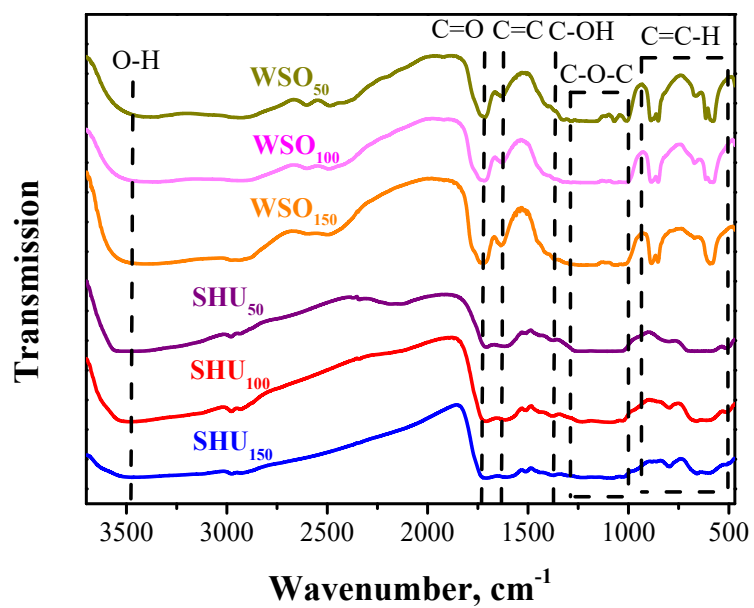

**Figure S7.** FTIR spectra of WSO and SHU from 50 g/L and 150 g/L of glucose conversion.

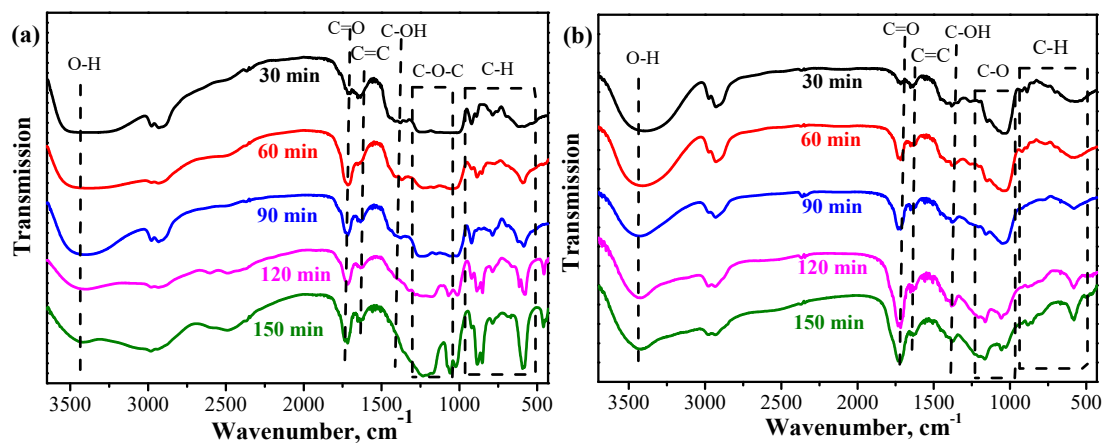

**Figure S8.** FT-IR spectra of WSO from 20 g/L (a) and 200 g/L (b) of glucose conversion with the increasing of the reaction time.

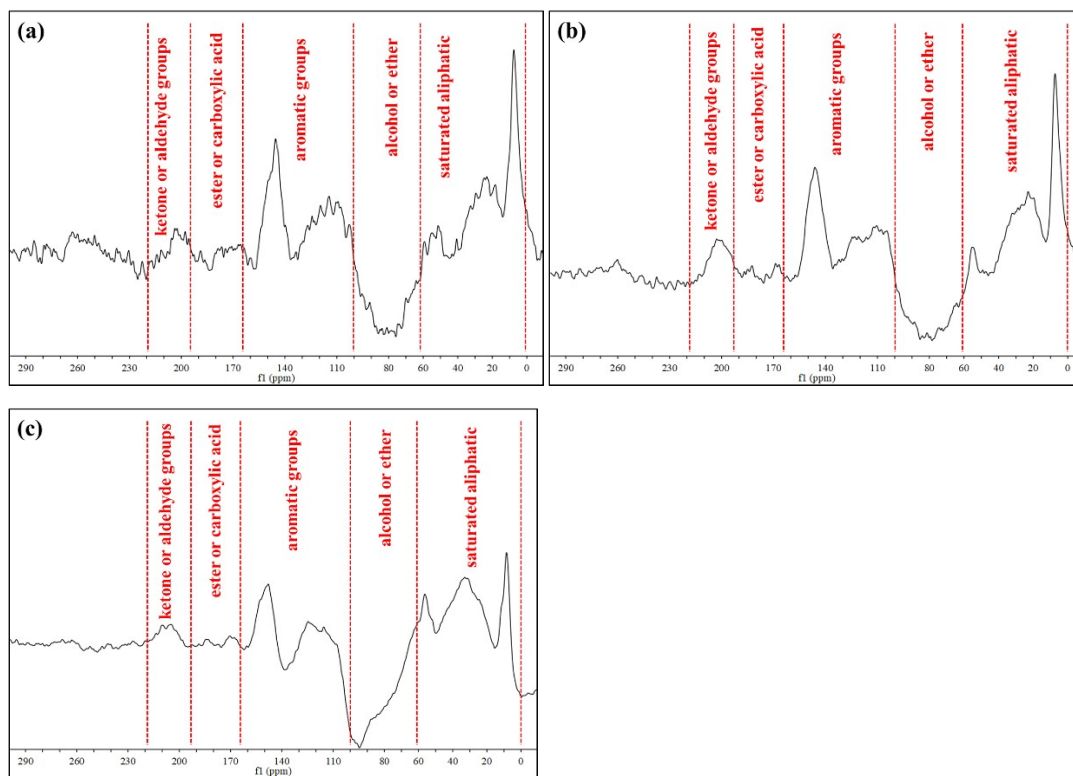

**Figure S9.**  $^{13}\text{C}$  CP MAS NMR spectra of SHU from 50 g/L (a), 100 g/L (b) and 150 g/L (c) of glucose conversion.

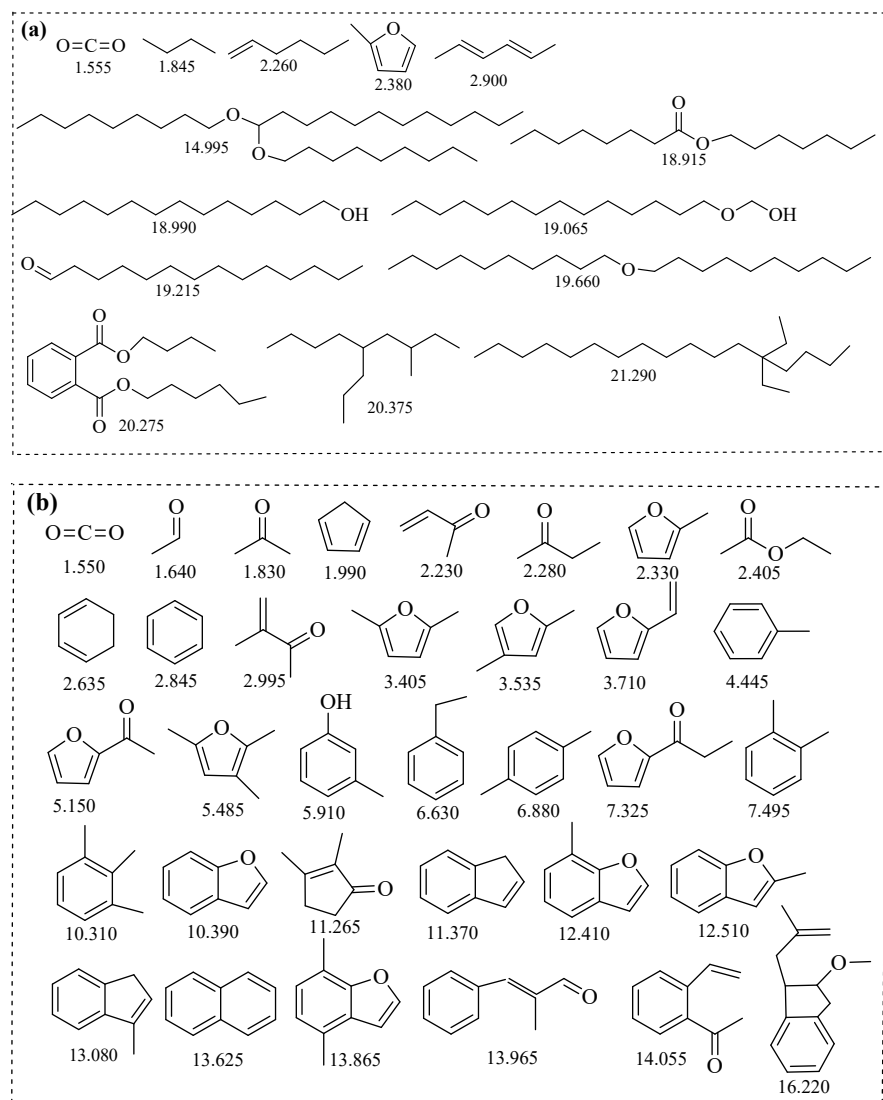

**Figure S10.** Pyrolysis/GC–MS chromatogram of SHU<sub>20</sub> (a) and SHU<sub>200</sub> (b).

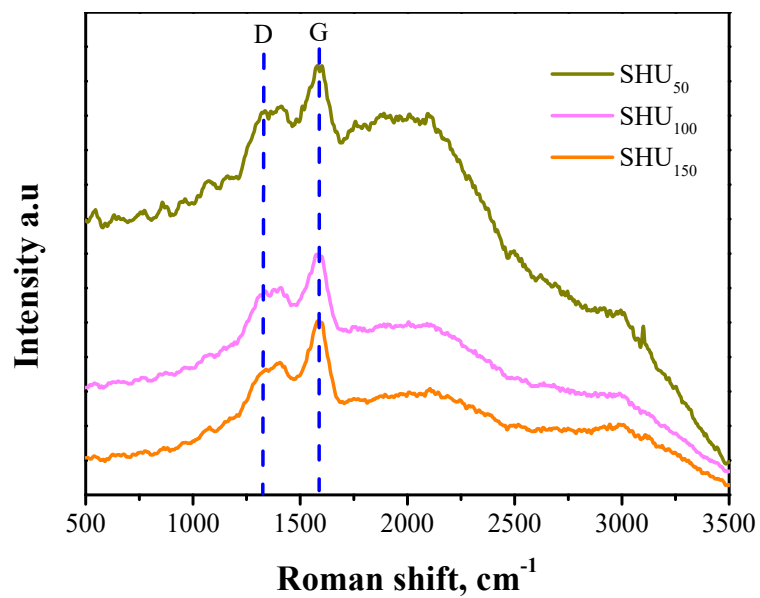

**Figure S11.** Raman spectra of SHU from 50 g/L (a), 100 g/L (b) and 150 g/L (c) of glucose conversion.

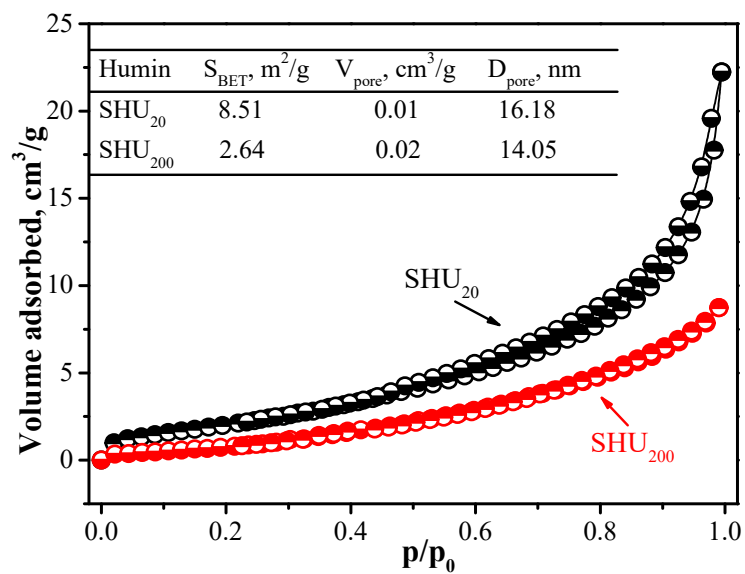

**Figure S12.** N<sub>2</sub> adsorption–desorption of SHU<sub>20</sub> and SHU<sub>200</sub>.

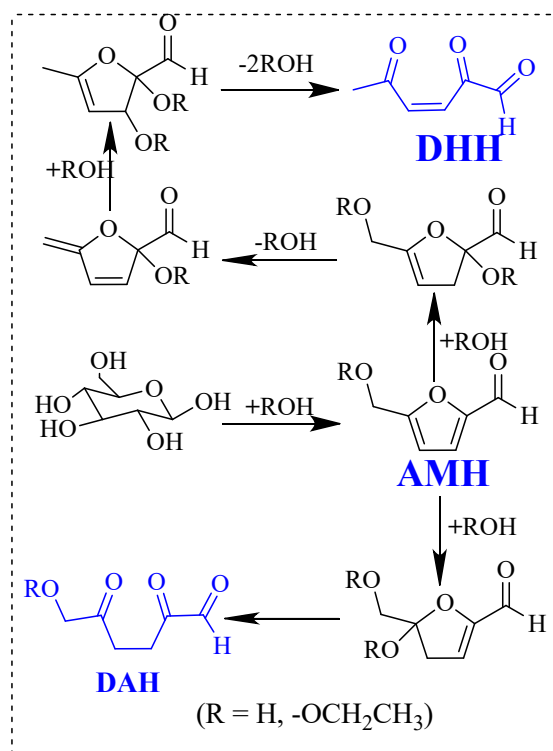

**Figure S13.** Transformation pathway of glucose to form DAH and DH.

**Table S1.** Assignment of the signals in the  $^{13}\text{C}$  CP MAS NMR spectra of SHU<sup>1</sup>.

| $\delta$ , ppm | Functional group            | Chemical formula   |
|----------------|-----------------------------|--------------------|
| 205            | ketone, aldehyde            | C=O, HC=O          |
| 175            | Acid, ester                 | COOH, COOR         |
| 150            | a carbon furan linked       | C=C-O              |
| 142            | a carbon furan terminal     | C=C-O              |
| 128            | furan conjugated            | C-C=C-C            |
| 120            | $\beta$ carbon furan linked | C-C=C-O            |
| 112            | $\beta$ carbon furan        | C-C=C-O            |
| 78             | alcohol, ether              | C-OH, C-O-C        |
| 48             | aliphatic                   | C-H, C             |
| 39             | aliphatic                   | C-H, C             |
| 28             | aliphatic                   | -CH <sub>2</sub> - |
| 15             | aliphatic                   | -CH <sub>3</sub>   |

## References:

1. van Zandvoort, I.; Wang, Y. H.; Rasrendra, C. B.; van Eck, E. R. H.; Bruijninx, P. C. A.; Heeres, H. J.; Weckhuysen, B. M., Formation, Molecular Structure, and Morphology of Humins in Biomass Conversion: Influence of Feedstock and Processing Conditions. *ChemSusChem* **2013**, *6* (9), 1745-1758.
